# Supplementary material for: Stereospecific recognition and rapid determination of d-amino acids in human serum based on luminescent metal–organic frameworks
Source: Royal Society of Chemistry journal article supplement (doi:10.1039/d1nj05570d), 2022-01-01
Supplement: d1nj05570d1.pdf [file d1nj05570d1.pdf]

# **Stereospecific recognition and rapid determination of D-amino acid in human serum based on luminescent metal-organic frameworks**

Qingju Liu<sup>a</sup>, Saixue Tang<sup>b,c</sup>, Hui Wang<sup>a</sup>, Ping Han<sup>\*a</sup>

a. Institute of Quality Standard and Testing Technology of Beijing Academy of Agriculture and Forestry Sciences, Beijing 100097, China;

b. Shandong University Of Traditional Chinese Medicine, Shandong 250355, China;

c. The Affiliated Hospital Of Shandong University of Traditional Chinese Medicine, Shandong 250014, China;

\*Corresponding author:

Tel/Fax: (010) 51503564

E-mail: hanp@brcast.org.cn

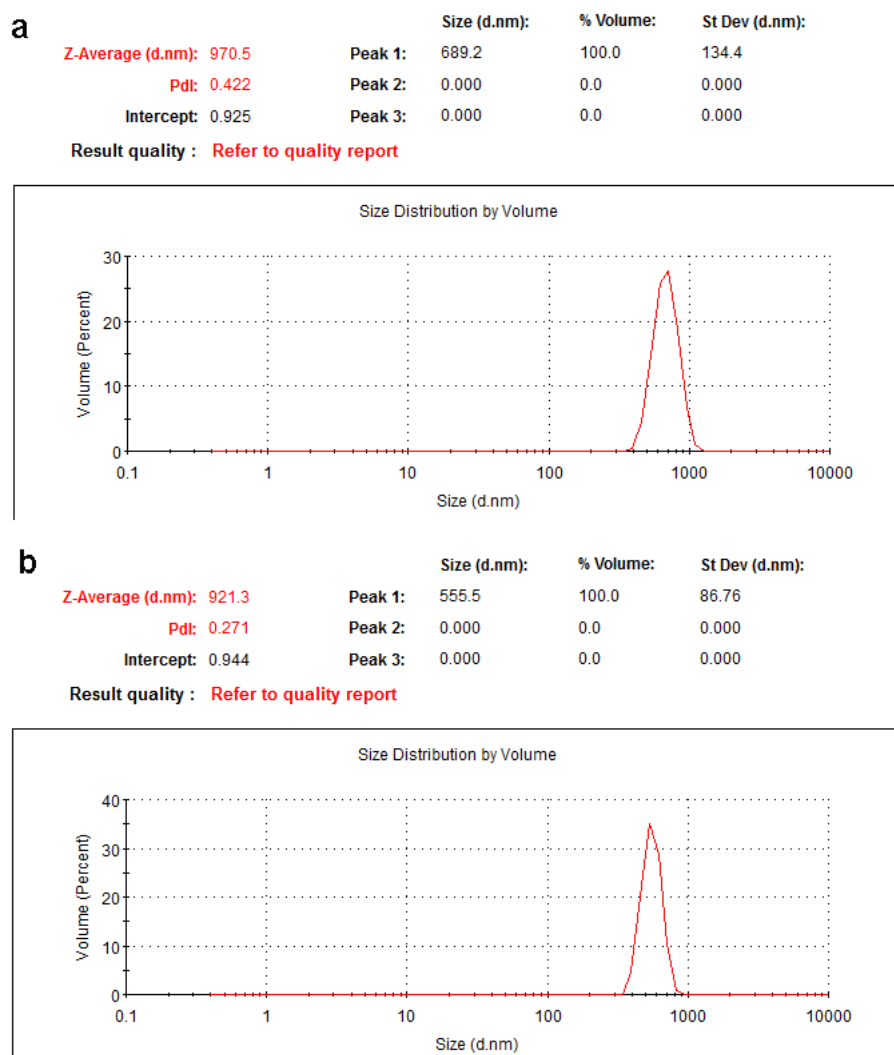

Fig. S1 The dynamic light scattering analysis of Tb-MOF in the absence (a) and presence (b) of  $\text{H}_2\text{O}_2$ .

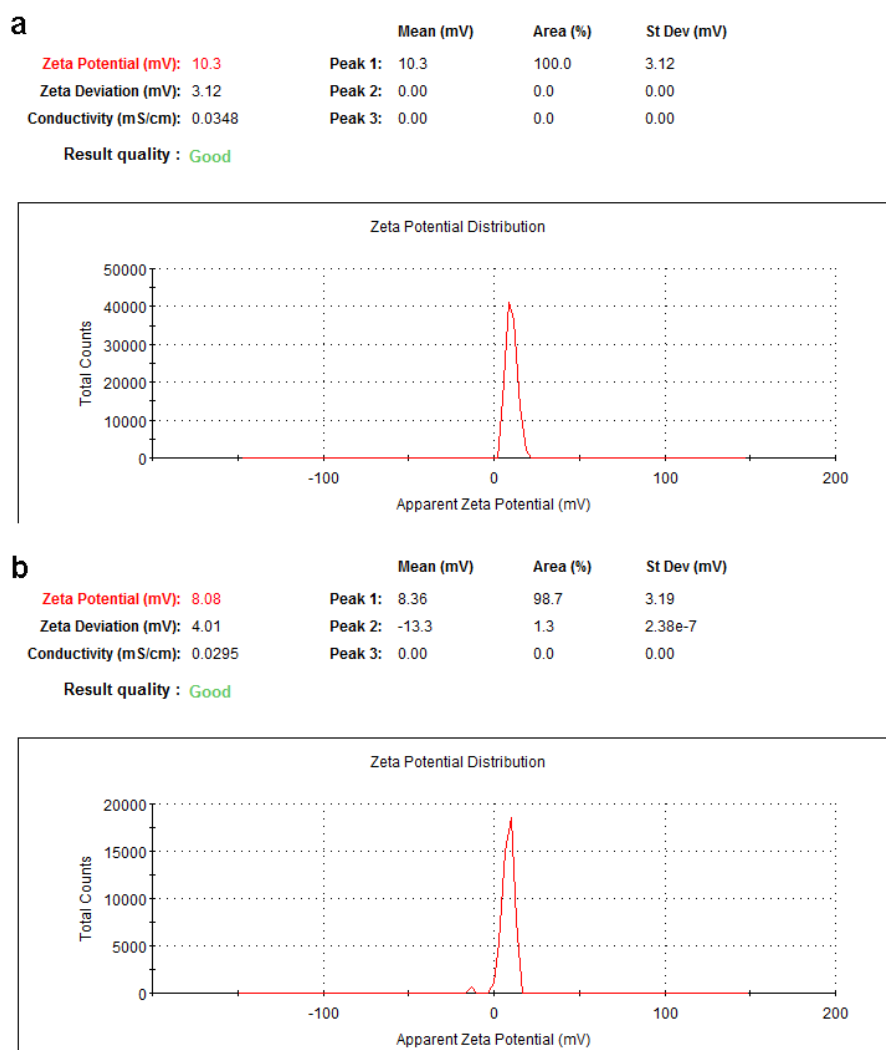

Fig. S2 Zeta potential of Tb-MOF in the absence (a) and presence (b) of  $\text{H}_2\text{O}_2$ .

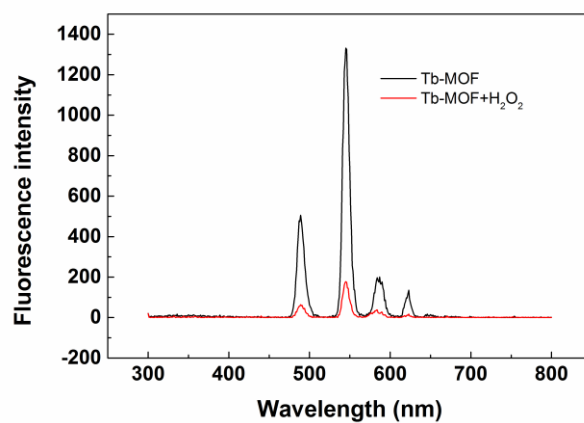

Fig. S3 Fluorescence spectra of Tb-MOF (line a) in the presence of  $\text{H}_2\text{O}_2$  (line b). The excitation wavelength is 290 nm.

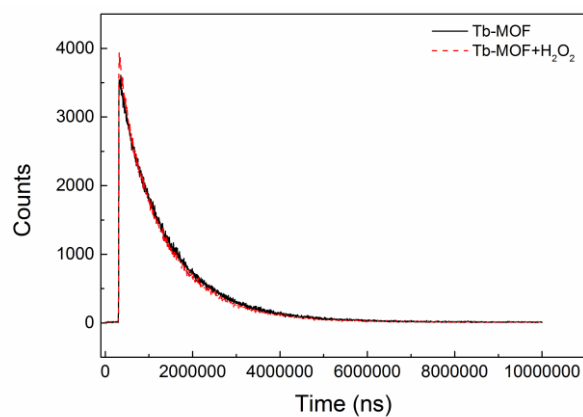

Fig. S4 Fluorescence decay curves of Tb-MOF in the presence of  $\text{H}_2\text{O}_2$

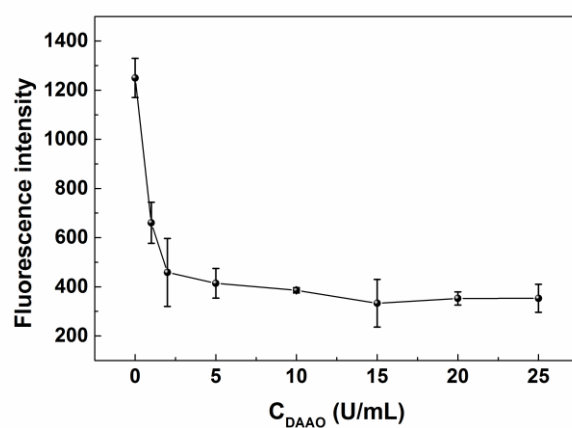

Fig. S5 Optimization of concentration of DAAO. The concentration of D-Ala and Tb-MOF used was  $100\ \mu\text{M}$ . And  $1\ \text{mg/mL}$ , respectively.

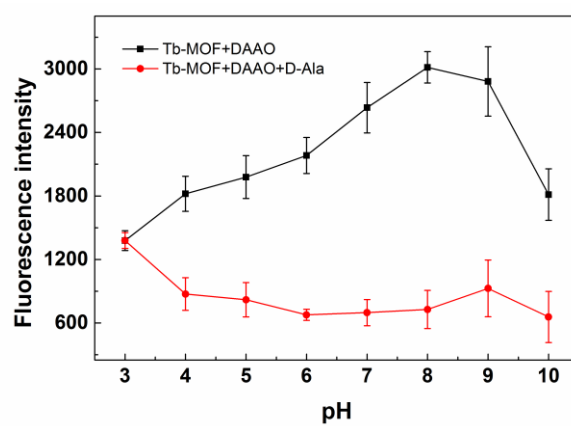

Fig. S6 Optimization of pH value. The concentration of D-Ala and Tb-MOF used was  $100\ \mu\text{M}$ . And  $1\ \text{mg/mL}$ , respectively

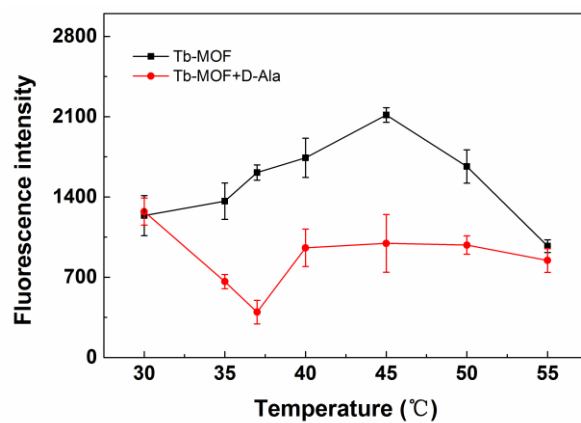

Fig. S7 Optimization of temperature. The concentration of D-Ala and Tb-MOF used was 100  $\mu$ M.

And 1 mg/mL, respectively

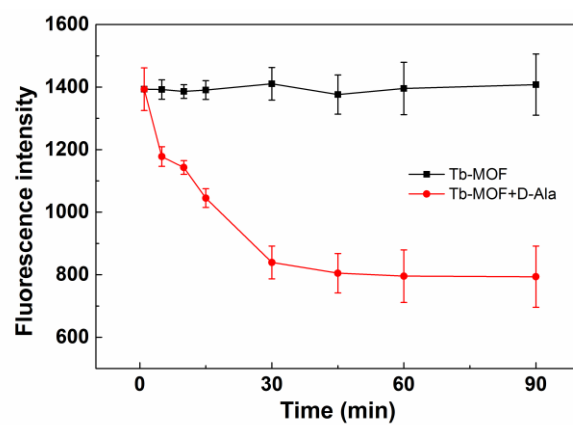

Fig. S8 Optimization of reaction time. The concentration of D-Ala and Tb-MOF used was 100  $\mu$ M.

And 1 mg/mL, respectively
